# Supplementary figures and images for: Interaction of desferrioxamine B (DFB) model dihydroxamic acids with some essential and toxic metal(ii) ions: effects of the structure and length of connecting chains on the metal ion selectivity
Source: Royal Society of Chemistry journal article supplement (doi:10.1039/b401426j), 2004-01-01

**a**

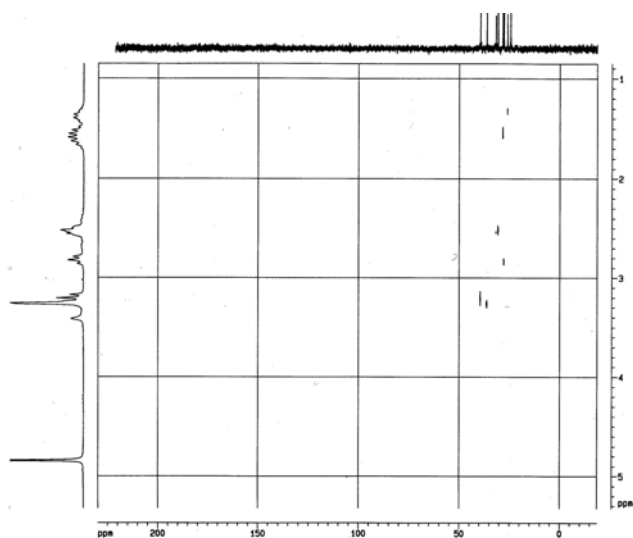

**b**

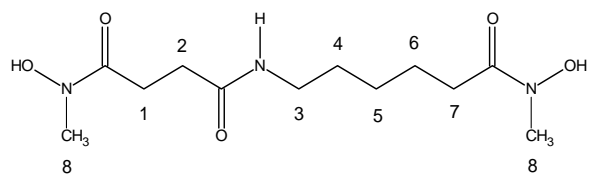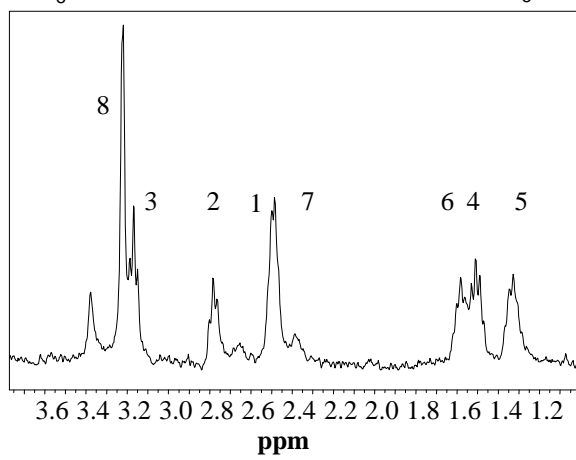

Supplement: b401426j1.pdf [file b401426j1.pdf]

**a**

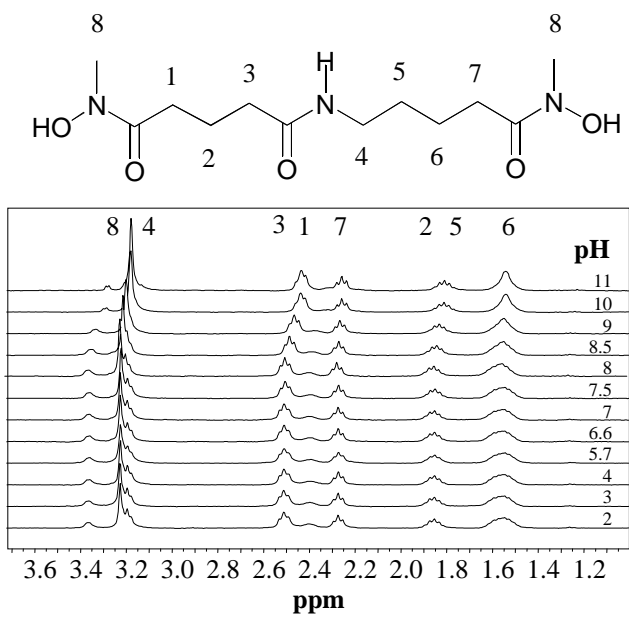

**b**

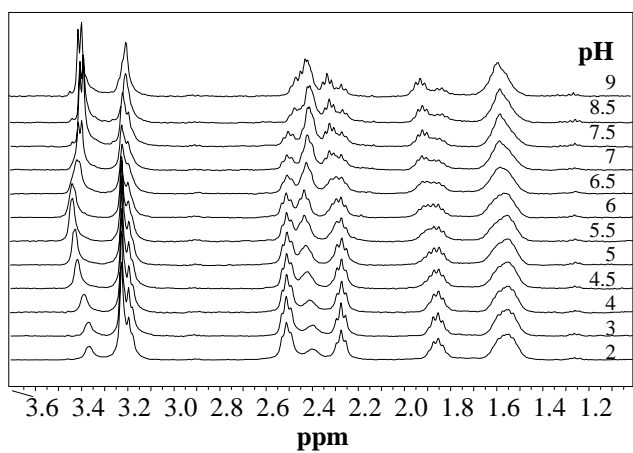

Supplement: b401426j2.pdf [file b401426j2.pdf]

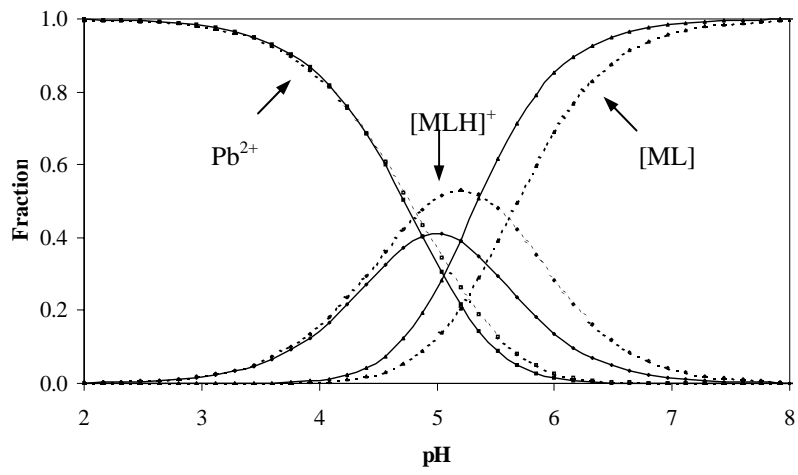

Supplement: b401426j5.pdf [file b401426j5.pdf]
